# Supplementary material for: Criterion validity of wearable monitors and smartphone applications to measure physical activity energy expenditure in adolescents
Source: Springer Nature journal article supplement (doi:10.1007/s11332-020-00654-2), 2020-06-04
Supplement: MOESM1 [file 11332_2020_654_MOESM1_ESM.docx]

**Bland-Altman plots**

40

60

80

100

120

140

-40

-30

-20

-10

0

10

20

30

40

Mean of PAEE Criterion and SenseWear for Walking

Mean

1,4

-1.96 SD

-32,5

+1.96 SD

35,3

**Figure 2.** Bland-Altman plot for SenseWear PAEE estimates during walking compared with criterion measure.

30

40

50

60

70

80

90

100

110

-40

-20

0

20

40

60

80

Mean of PAEE Criterion and Forerunner for Walking

Mean

15,6

-1.96 SD

-23,4

+1.96 SD

54,6

**Figure 3.** Bland-Altman plot for Forerunner PAEE estimates during walking compared with criterion measure.

40

50

60

70

80

90

100

-60

-40

-20

0

20

40

60

80

100

Mean of PAEE Criterion and Runkeeper for Walking

Mean

12,5

-1.96 SD

-39,8

+1.96 SD

64,7

**Figure 4.** Bland-Altman plot for Runkeeper 2.0 PAEE estimates during walking compared with criterion measure.

40

60

80

100

120

140

-60

-40

-20

0

20

40

60

Mean of PAEE Criterion and Runtastic for Walking

Mean

9,8

-1.96 SD

-25,0

+1.96 SD

44,6

**Figure 5.** Bland-Altman plot for Runtastic estimates during walking compared with criterion measure.

40

50

60

70

80

90

100

110

-80

-60

-40

-20

0

20

40

60

80

100

Mean of PAEE Criterion and SportsTracker for Walking

Mean

-2,2

-1.96 SD

-54,7

+1.96 SD

50,4

**Figure 6.** Bland-Altman plot for Sports Tracker PAEE estimates during walking compared with criterion measure.

20

40

60

80

100

120

-60

-40

-20

0

20

40

60

80

Mean of PAEE Criterion and Vivofit for Walking

Mean

6,9

-1.96 SD

-44,0

+1.96 SD

57,9

**Figure 7.** Bland-Altman plot for Vivofit PAEE estimates during walking compared with criterion measure.

40

60

80

100

120

140

-30

-20

-10

0

10

20

30

40

Mean of PAEE Criterion and Vifit for Walking

Mean

3,8

-1.96 SD

-21,8

+1.96 SD

29,5

**Figure 8.** Bland-Altman plot for Vifit PAEE estimates during walking compared with criterion measure.

40

60

80

100

120

140

160

-60

-40

-20

0

20

40

60

Mean of PAEE Criterion and Pedometer for Walking

Mean

-2,9

-1.96 SD

-42,6

+1.96 SD

36,8

**Figure 9.** Bland-Altman plot for Pedometer PAEE estimates during walking compared with criterion measure.

40

60

80

100

120

140

-30

-20

-10

0

10

20

30

40

50

Mean of PAEE Criterion and Accupedo for Walking

Mean

7,3

-1.96 SD

-22,9

+1.96 SD

37,5

**Figure 10.** Bland-Altman plot for Accupedo PAEE estimates during walking compared with criterion measure.

40

60

80

100

120

140

160

180

-60

-40

-20

0

20

40

60

Mean of PAEE Criterion and Pedometer 2.0 for Walking

Mean

-6,9

-1.96 SD

-50,2

+1.96 SD

36,4

**Figure 11.** Bland-Altman plot for Pedometer 2.0 PAEE estimates during walking compared with criterion measure.

40

60

80

100

120

140

-20

-10

0

10

20

30

40

Mean of PAEE Criterion and SenseWear for Running

Mean

9,1

-1.96 SD

-16,5

+1.96 SD

34,6

**Figure 12.** Bland-Altman plot for SenseWear PAEE estimates during running compared with criterion measure.

40

50

60

70

80

90

100

110

-40

-20

0

20

40

60

80

100

Mean of PAEE Criterion and Forerunner for Running

Mean

20,7

-1.96 SD

-22,8

+1.96 SD

64,3

**Figure 13.** Bland-Altman plot for Forerunner PAEE estimates during running compared with criterion measure.

40

60

80

100

120

140

-30

-20

-10

0

10

20

30

40

Mean of PAEE Criterion and Runkeeper for Running

Mean

8,1

-1.96 SD

-18,3

+1.96 SD

34,4

**Figure 14.** Bland-Altman plot for Runkeeper PAEE estimates during running compared with criterion measure.

40

60

80

100

120

140

160

-30

-20

-10

0

10

20

30

Mean of PAEE Criterion and Runtastic for Running

Mean

1,6

-1.96 SD

-20,8

+1.96 SD

24,0

**Figure 15.** Bland-Altman plot for Runtastic PAEE estimates during running compared with criterion measure.

60

70

80

90

100

110

-80

-60

-40

-20

0

20

40

60

80

Mean of PAEE Criterion and SportsTracker for Running

Mean

-11,0

-1.96 SD

-63,8

+1.96 SD

41,8

**Figure 16.** Bland-Altman plot for Sports Tracker PAEE estimates during running compared with criterion measure.

40

60

80

100

120

140

160

-60

-50

-40

-30

-20

-10

0

10

20

30

40

Mean of PAEE Criterion and Vivofit for Running

Mean

-5,5

-1.96 SD

-42,3

+1.96 SD

31,2

**Figure 17.** Bland-Altman plot for Vivofit 2.0 PAEE estimates during running compared with criterion measure.

20

40

60

80

100

120

-10

0

10

20

30

40

50

60

Mean of PAEE Criterion and Vifit for Running

Mean

27,3

-1.96 SD

1,6

+1.96 SD

53,0

**Figure 18.** Bland-Altman plot for Vifit PAEE estimates during running compared with criterion measure.

40

60

80

100

120

140

160

-40

-20

0

20

40

60

Mean of PAEE Criterion and Pedomter for Running

Mean

9,8

-1.96 SD

-31,4

+1.96 SD

51,0

**Figure 19.** Bland-Altman plot for Pedometer PAEE estimates during running compared with criterion measure.

40

60

80

100

120

140

160

180

-80

-60

-40

-20

0

20

40

60

Mean of PAEE Criterion and Accupedo for Running

Mean

-10,8

-1.96 SD

-60,8

+1.96 SD

39,3

**Figure 20.** Bland-Altman plot for Accupedo PAEE estimates during running compared with criterion measure.

50

100

150

200

250

-200

-150

-100

-50

0

50

100

Mean of PAEE Criterion and Pedometer 2.0 for Running

Mean

-18,7

-1.96 SD

-107,8

+1.96 SD

70,4

**Figure 21.** Bland-Altman plot for Pedometer 2.0 PAEE estimates during running compared with criterion measure.
